# Supplementary material for: Firefighters’ Occupational Exposure in Preparation for Wildfire Season: Addressing Biological Impact
Source: MDPI journal article supplement (doi:10.3390/toxics12030201), 2024-03-05
Supplement: s1 [file s1]

## Supplementary Material

**Table S1.** Summary of parameters considered for inhalation dose estimation, specifically the concentration of PM both indoor and outdoor in the seven sampled fire station (A); the time of exposure both indoor and outdoor (B) and the Inhalation Rate in males and in females, by age category, unadjusted for body weight (C).

| Parameters considered for inhalation dose estimation: |                                                   |                                    |                                                    |                                     |       |       |       |       |
|-------------------------------------------------------|---------------------------------------------------|------------------------------------|----------------------------------------------------|-------------------------------------|-------|-------|-------|-------|
| A. Mean concentration of PM (µg/m³):                  |                                                   |                                    |                                                    |                                     |       |       |       |       |
|                                                       |                                                   | FS1                                | FS2                                                | FS3                                 | FS4   | FS5   | FS6   | FS7   |
| Indoors                                               |                                                   |                                    |                                                    |                                     |       |       |       |       |
|                                                       | PM <sub>10</sub>                                  | 16.10                              | 7.90                                               | 7.50                                | 11.90 | 9.30  | 11.50 | 9.20  |
|                                                       | PM <sub>2.5</sub>                                 | 14.10                              | 6.30                                               | 6.40                                | 10.50 | 7.70  | 9.20  | 6.70  |
| Outdoors                                              |                                                   |                                    |                                                    |                                     |       |       |       |       |
|                                                       | PM <sub>10</sub>                                  | 19.00                              | 15.80                                              | 27.00                               | 25.00 | 17.00 | 23.00 | 21.60 |
|                                                       | PM <sub>2.5</sub>                                 | 4.00                               | 2.30                                               | 7.70                                | 6.00  | 6.00  | 3.00  | 2.70  |
| B. Time of exposure:                                  |                                                   |                                    |                                                    |                                     |       |       |       |       |
| Daily time spent in FC (hours/day) <sup>a</sup>       | Daily time spent indoors (hours/day) <sup>b</sup> | Daily time spent indoors (min/day) | Daily time spent outdoors (hours/day) <sup>c</sup> | Daily time spent outdoors (min/day) |       |       |       |       |
| 12.00                                                 | 3.60                                              | 216                                | 8.40                                               | 504                                 |       |       |       |       |
| 8.00                                                  | 2.40                                              | 144                                | 5.60                                               | 336                                 |       |       |       |       |
| C. Inhalation Rate by Age Group:                      |                                                   |                                    |                                                    |                                     |       |       |       |       |
| Age (years)                                           | Males                                             |                                    | Females                                            |                                     |       |       |       |       |
|                                                       | Daily Inhalation Rate (m³/day) <sup>d</sup>       | Inhalation Rate Min (m³/min)       | Daily Inhalation Rate (m³/day) <sup>e</sup>        | Inhalation Rate Min (m³/min)        |       |       |       |       |
| 16 to <21                                             | 17.21                                             | 1.19 × 10 <sup>-2</sup>            | 13.59                                              | 9.44 × 10 <sup>-3</sup>             |       |       |       |       |
| 21 to <31                                             | 18.82                                             | 1.31 × 10 <sup>-2</sup>            | 14.57                                              | 1.01 × 10 <sup>-2</sup>             |       |       |       |       |
| 31 to <41                                             | 20.29                                             | 1.41 × 10 <sup>-2</sup>            | 14.98                                              | 1.04 × 10 <sup>-2</sup>             |       |       |       |       |
| 41 to <51                                             | 20.94                                             | 1.45 × 10 <sup>-2</sup>            | 16.20                                              | 1.13 × 10 <sup>-2</sup>             |       |       |       |       |
| 51 to <61                                             | 20.91                                             | 1.45 × 10 <sup>-2</sup>            | 16.19                                              | 1.12 × 10 <sup>-2</sup>             |       |       |       |       |
| 61 to <71                                             | 17.94                                             | 1.25 × 10 <sup>-2</sup>            | 12.99                                              | 9.02 × 10 <sup>-3</sup>             |       |       |       |       |

<sup>a</sup> Information retrieved from the questionnaire; <sup>b</sup> Considering a reported permanence of 30%; <sup>c</sup> Considering a reported permanence of 70%; <sup>d</sup> Adapted from Table 6.14 of Exposure Factors Handbook (USEPA, 2011); <sup>e</sup> Adapted from Table 6.15 from Exposure Factor Handbook (USEPA, 2011).
